# Supplementary material for: Identification of m7G-Related miRNA Signatures Associated with Prognosis, Oxidative Stress, and Immune Landscape in Lung Adenocarcinoma
Source: MDPI journal article supplement (doi:10.3390/biomedicines11061569), 2023-05-29
Supplement: s1 [file s1]

# Supplementary Table

Supplementary Table S1 Clinicopathological features of the LUAD in the TCGA cohort

| Clinicopathological features |           | Number(percent) |
|------------------------------|-----------|-----------------|
| Age                          |           | 151(33.2%)      |
|                              | ≤60       | 304(66.8%)      |
|                              | >60       |                 |
| Gender                       | Male      | 204(44.8%)      |
|                              | Female    | 251(55.2%)      |
| Stage                        | Stage I   | 249(54.7%)      |
|                              | Stage II  | 108(23.7%)      |
|                              | Stage III | 74(16.3%)       |
|                              | Stage IV  | 24(5.3%)        |
| T stage                      | T1        | 160(35.2%)      |
|                              | T2        | 237(52.1%)      |
|                              | T3        | 38(8.4%)        |
|                              | T4        | 17(3.7%)        |
|                              | Tx        | 3(0.6%)         |
|                              |           |                 |
| N stage                      | N0        | 294(64.6%)      |
|                              | N1        | 85(18.7%)       |
|                              | N2        | 64(14.1%)       |
|                              | N3        | 2(0.4%)         |
|                              | Nx        | 10(2.2%)        |
|                              |           |                 |
| M stage                      | M0        | 308(67.7%)      |
|                              | M1        | 23(5.0%)        |
|                              | Mx        | 124(27.3%)      |
| Status                       | Alive     | 300(65.9%)      |
|                              | Dead      | 155(23.1%)      |
| Survival Median(months)      |           | 18.8            |

Supplementary Table S2 Univariate Cox regression analysis for the m7G-related DMEs and OS of LUAD

| ID              | HR       | HR.95L   | HR.95H   | P value  |
|-----------------|----------|----------|----------|----------|
| hsa-miR-548t-5p | 1.003774 | 1.000299 | 1.00726  | 0.033257 |
| hsa-let-7f-1-3p | 0.136707 | 0.021108 | 0.885373 | 0.036826 |
| hsa-miR-590-3p  | 1.0028   | 1.000029 | 1.005578 | 0.047675 |
| hsa-miR-718     | 1.00905  | 1.002558 | 1.015584 | 0.006223 |

|                  |          |          |          |          |
|------------------|----------|----------|----------|----------|
| hsa-miR-153-3p   | 0.999917 | 0.999843 | 0.999991 | 0.028812 |
| hsa-miR-4797-5p  | 1.146813 | 1.019358 | 1.290204 | 0.022672 |
| hsa-miR-32-5p    | 1.006073 | 1.002969 | 1.009187 | 0.000123 |
| hsa-miR-3922-5p  | 1.018626 | 1.004081 | 1.033381 | 0.011902 |
| hsa-miR-490-5p   | 1.016017 | 1.004098 | 1.028078 | 0.00831  |
| hsa-miR-1281     | 1.027378 | 1.008622 | 1.046483 | 0.004064 |
| hsa-miR-483-5p   | 1.001926 | 1.000404 | 1.00345  | 0.013134 |
| hsa-miR-579-3p   | 1.292089 | 1.08765  | 1.534955 | 0.003545 |
| hsa-miR-645      | 1.001688 | 1.000366 | 1.003011 | 0.01229  |
| hsa-miR-107      | 1.000018 | 1.000001 | 1.000035 | 0.033318 |
| hsa-miR-216b-5p  | 1.006269 | 1.00087  | 1.011696 | 0.022793 |
| hsa-miR-143-5p   | 1.019173 | 1.004497 | 1.034064 | 0.010279 |
| hsa-miR-4666a-5p | 0.881132 | 0.780349 | 0.994932 | 0.041156 |
| hsa-miR-548j-3p  | 0.367689 | 0.158104 | 0.855103 | 0.020153 |
| hsa-miR-335-5p   | 1.004613 | 1.000186 | 1.00906  | 0.041114 |
| hsa-miR-4747-5p  | 1.044223 | 1.013734 | 1.075629 | 0.004207 |
| hsa-miR-3183     | 1.006004 | 1.000119 | 1.011923 | 0.045542 |
| hsa-miR-383-3p   | 17.29699 | 1.112963 | 268.8193 | 0.041708 |
| hsa-miR-6854-5p  | 0.537863 | 0.296864 | 0.97451  | 0.040844 |
| hsa-miR-548u     | 1.002982 | 1.000262 | 1.00571  | 0.031619 |
| hsa-miR-665      | 1.072416 | 1.006339 | 1.142832 | 0.031185 |
| hsa-miR-6795-5p  | 4.79939  | 1.497727 | 15.3794  | 0.008295 |
| hsa-miR-4476     | 1.2028   | 1.035942 | 1.396533 | 0.015376 |
| hsa-miR-6720-5p  | 2.575799 | 1.034336 | 6.414489 | 0.042105 |
| hsa-miR-3162-5p  | 0.757587 | 0.577716 | 0.993459 | 0.044705 |
| hsa-miR-3124-3p  | 1.018184 | 1.008203 | 1.028263 | 0.000336 |
| hsa-miR-6825-5p  | 1.265423 | 1.085848 | 1.474696 | 0.002572 |
| hsa-miR-3912-5p  | 1.19727  | 1.081911 | 1.324928 | 0.000496 |
| hsa-miR-518a-5p  | 1.005901 | 1.000976 | 1.010849 | 0.018787 |
| hsa-miR-4665-3p  | 4.127531 | 1.44402  | 11.79797 | 0.008153 |
| hsa-miR-4420     | 1.388356 | 1.034049 | 1.864062 | 0.029058 |
| hsa-miR-6828-3p  | 1.732399 | 1.103934 | 2.718648 | 0.016847 |
| hsa-miR-4802-3p  | 3.138424 | 1.024784 | 9.611496 | 0.045195 |
| hsa-miR-890      | 1.36975  | 1.050795 | 1.78552  | 0.020002 |

Supplementary Table S3 Oxidative stress-related genes screened out from genecards

| Gene Symbol | Description                      | Relevance score |
|-------------|----------------------------------|-----------------|
| NOS3        | Nitric Oxide Synthase 3          | 64.48183        |
| NOS2        | Nitric Oxide Synthase 2          | 58.57753        |
| CPT2        | Carnitine Palmitoyltransferase 2 | 47.16217        |
| NOS1        | Nitric Oxide Synthase 1          | 47.10598        |

|        |                                                           |          |
|--------|-----------------------------------------------------------|----------|
| SOD1   | Superoxide Dismutase 1                                    | 45.70882 |
| CAT    | Catalase                                                  | 45.34208 |
| TNF    | Tumor Necrosis Factor                                     | 39.16946 |
| NFE2L2 | NFE2 Like BZIP Transcription Factor 2                     | 38.07993 |
| HMOX1  | Heme Oxygenase 1                                          | 37.94664 |
| RYR2   | Ryanodine Receptor 2                                      | 37.92735 |
| TP53   | Tumor Protein P53                                         | 37.46856 |
| OXSRL  | Oxidative Stress Responsive Kinase 1                      | 35.01617 |
| AIFM1  | Apoptosis Inducing Factor Mitochondria Associated 1       | 34.96143 |
| SOD2   | Superoxide Dismutase 2                                    | 34.72543 |
| GFM1   | G Elongation Factor Mitochondrial 1                       | 33.49869 |
| ELAC2  | ElaC Ribonuclease Z 2                                     | 32.35224 |
| MAPK14 | Mitogen-Activated Protein Kinase 14                       | 32.21059 |
| CARS2  | CysteinyI-TRNA Synthetase 2, Mitochondrial                | 32.13576 |
| GSR    | Glutathione-Disulfide Reductase                           | 32.06275 |
| FARS2  | Phenylalanyl-TRNA Synthetase 2, Mitochondrial             | 32.02698 |
| OSGIN1 | Oxidative Stress Induced Growth Inhibitor 1               | 31.78491 |
| MAPK8  | Mitogen-Activated Protein Kinase 8                        | 31.02646 |
| MPO    | Myeloperoxidase                                           | 30.07912 |
| AARS2  | Alanyl-TRNA Synthetase 2, Mitochondrial                   | 29.96805 |
| XDH    | Xanthine Dehydrogenase                                    | 29.7263  |
| OSER1  | Oxidative Stress Responsive Serine Rich 1                 | 29.67412 |
| TXN    | Thioredoxin                                               | 28.18364 |
| IL6    | Interleukin 6                                             | 28.14098 |
| MTO1   | Mitochondrial TRNA Translation Optimization 1             | 28.14016 |
| OSGIN2 | Oxidative Stress Induced Growth Inhibitor Family Member 2 | 27.29734 |
| EARS2  | Glutamyl-TRNA Synthetase 2, Mitochondrial                 | 27.15174 |
| MAPK1  | Mitogen-Activated Protein Kinase 1                        | 26.73636 |
| TUFM   | Tu Translation Elongation Factor, Mitochondrial           | 26.28376 |
| PARK7  | Parkinsonism Associated Deglycase                         | 26.04134 |
| VARS2  | Valyl-TRNA Synthetase 2, Mitochondrial                    | 25.91225 |
| OLR1   | Oxidized Low Density Lipoprotein Receptor 1               | 25.90836 |
| PNPT1  | Polyribonucleotide Nucleotidyltransferase 1               | 25.53405 |
| G6PD   | Glucose-6-Phosphate Dehydrogenase                         | 25.43587 |
| CASQ2  | Calsequestrin 2                                           | 25.40843 |
| IL1B   | Interleukin 1 Beta                                        | 25.31738 |
| TSFM   | Ts Translation Elongation Factor, Mitochondrial           | 25.28477 |
| SIRT1  | Sirtuin 1                                                 | 24.82348 |
| MTFMT  | Mitochondrial Methionyl-TRNA Formyltransferase            | 24.77712 |
| CYCS   | Cytochrome C, Somatic                                     | 24.16202 |
| TXN2   | Thioredoxin 2                                             | 23.80745 |

|        |                                                                               |          |
|--------|-------------------------------------------------------------------------------|----------|
| CASP3  | Caspase 3                                                                     | 23.75385 |
| NQO1   | NAD(P)H Quinone Dehydrogenase 1                                               | 23.08655 |
| PON1   | Paraoxonase 1                                                                 | 23.08622 |
| GPX1   | Glutathione Peroxidase 1                                                      | 22.64148 |
| PTGS2  | Prostaglandin-Endoperoxide Synthase 2                                         | 22.4342  |
| APP    | Amyloid Beta Precursor Protein                                                | 22.36378 |
| CALM1  | Calmodulin 1                                                                  | 22.35473 |
| CXCL8  | C-X-C Motif Chemokine Ligand 8                                                | 22.29916 |
| NOS1AP | Nitric Oxide Synthase 1 Adaptor Protein                                       | 22.22334 |
| ALB    | Albumin                                                                       | 22.20159 |
| HSPA5  | Heat Shock Protein Family A (Hsp70) Member 5                                  | 22.11136 |
| CRP    | C-Reactive Protein                                                            | 21.93054 |
| MAP3K5 | Mitogen-Activated Protein Kinase Kinase Kinase 5                              | 21.88529 |
| MRPL44 | Mitochondrial Ribosomal Protein L44                                           | 21.87213 |
| SLC6A4 | Solute Carrier Family 6 Member 4                                              | 21.81761 |
| CYBA   | Cytochrome B-245 Alpha Chain                                                  | 21.54678 |
| CRH    | Corticotropin Releasing Hormone                                               | 21.42203 |
| MTRFR  | Mitochondrial Translation Release Factor In Rescue                            | 21.39492 |
| ACADVL | Acyl-CoA Dehydrogenase Very Long Chain                                        | 21.37822 |
| HADHA  | Hydroxyacyl-CoA Dehydrogenase Trifunctional Multienzyme Complex Subunit Alpha | 21.33283 |
| POLR1C | RNA Polymerase I And III Subunit C                                            | 21.2511  |
| GFM2   | GTP Dependent Ribosome Recycling Factor Mitochondrial 2                       | 21.20901 |
| INS    | Insulin                                                                       | 21.16934 |
| FOXO3  | Forkhead Box O3                                                               | 21.16576 |
| JUN    | Jun Proto-Oncogene, AP-1 Transcription Factor Subunit                         | 21.14929 |
| GSTM1  | Glutathione S-Transferase Mu 1                                                | 21.11669 |
| GTPBP3 | GTP Binding Protein 3, Mitochondrial                                          | 21.10775 |
| OGG1   | 8-Oxoguanine DNA Glycosylase                                                  | 20.92929 |
| HADHB  | Hydroxyacyl-CoA Dehydrogenase Trifunctional Multienzyme Complex Subunit Beta  | 20.84848 |
| G3BP1  | G3BP Stress Granule Assembly Factor 1                                         | 20.80472 |
| XBP1   | X-Box Binding Protein 1                                                       | 20.65782 |
| RYR1   | Ryanodine Receptor 1                                                          | 20.56754 |
| DDIT3  | DNA Damage Inducible Transcript 3                                             | 20.49874 |
| ADPRS  | ADP-Ribosylserine Hydrolase                                                   | 20.36423 |
| GSTP1  | Glutathione S-Transferase Pi 1                                                | 20.25571 |
| FOXO1  | Forkhead Box O1                                                               | 20.19759 |
| ATF4   | Activating Transcription Factor 4                                             | 20.16486 |
| PRDX2  | Peroxisredoxin 2                                                              | 20.00371 |

Supplementary Table S4 The drug associated with hsa-miR-890 predicted by RNAactDrug

| miRNA       | Drug     | Omics      | Source | Spearman.stat | Spearman.fdr |
|-------------|----------|------------|--------|---------------|--------------|
| hsa-miR-890 | Nutlin-3 | Expression | CCE    | 0.235         | 0.011        |
